# Supplementary material for: International trends in lung cancer incidence from 1973 to 2007
Source: PubMed Central journal article supplement (PMC5911623; doi:10.1002/cam4.1359), 2018-03-14
Supplement: CAM4-7-1479-s001.pdf [file CAM4-7-1479-s001.pdf]

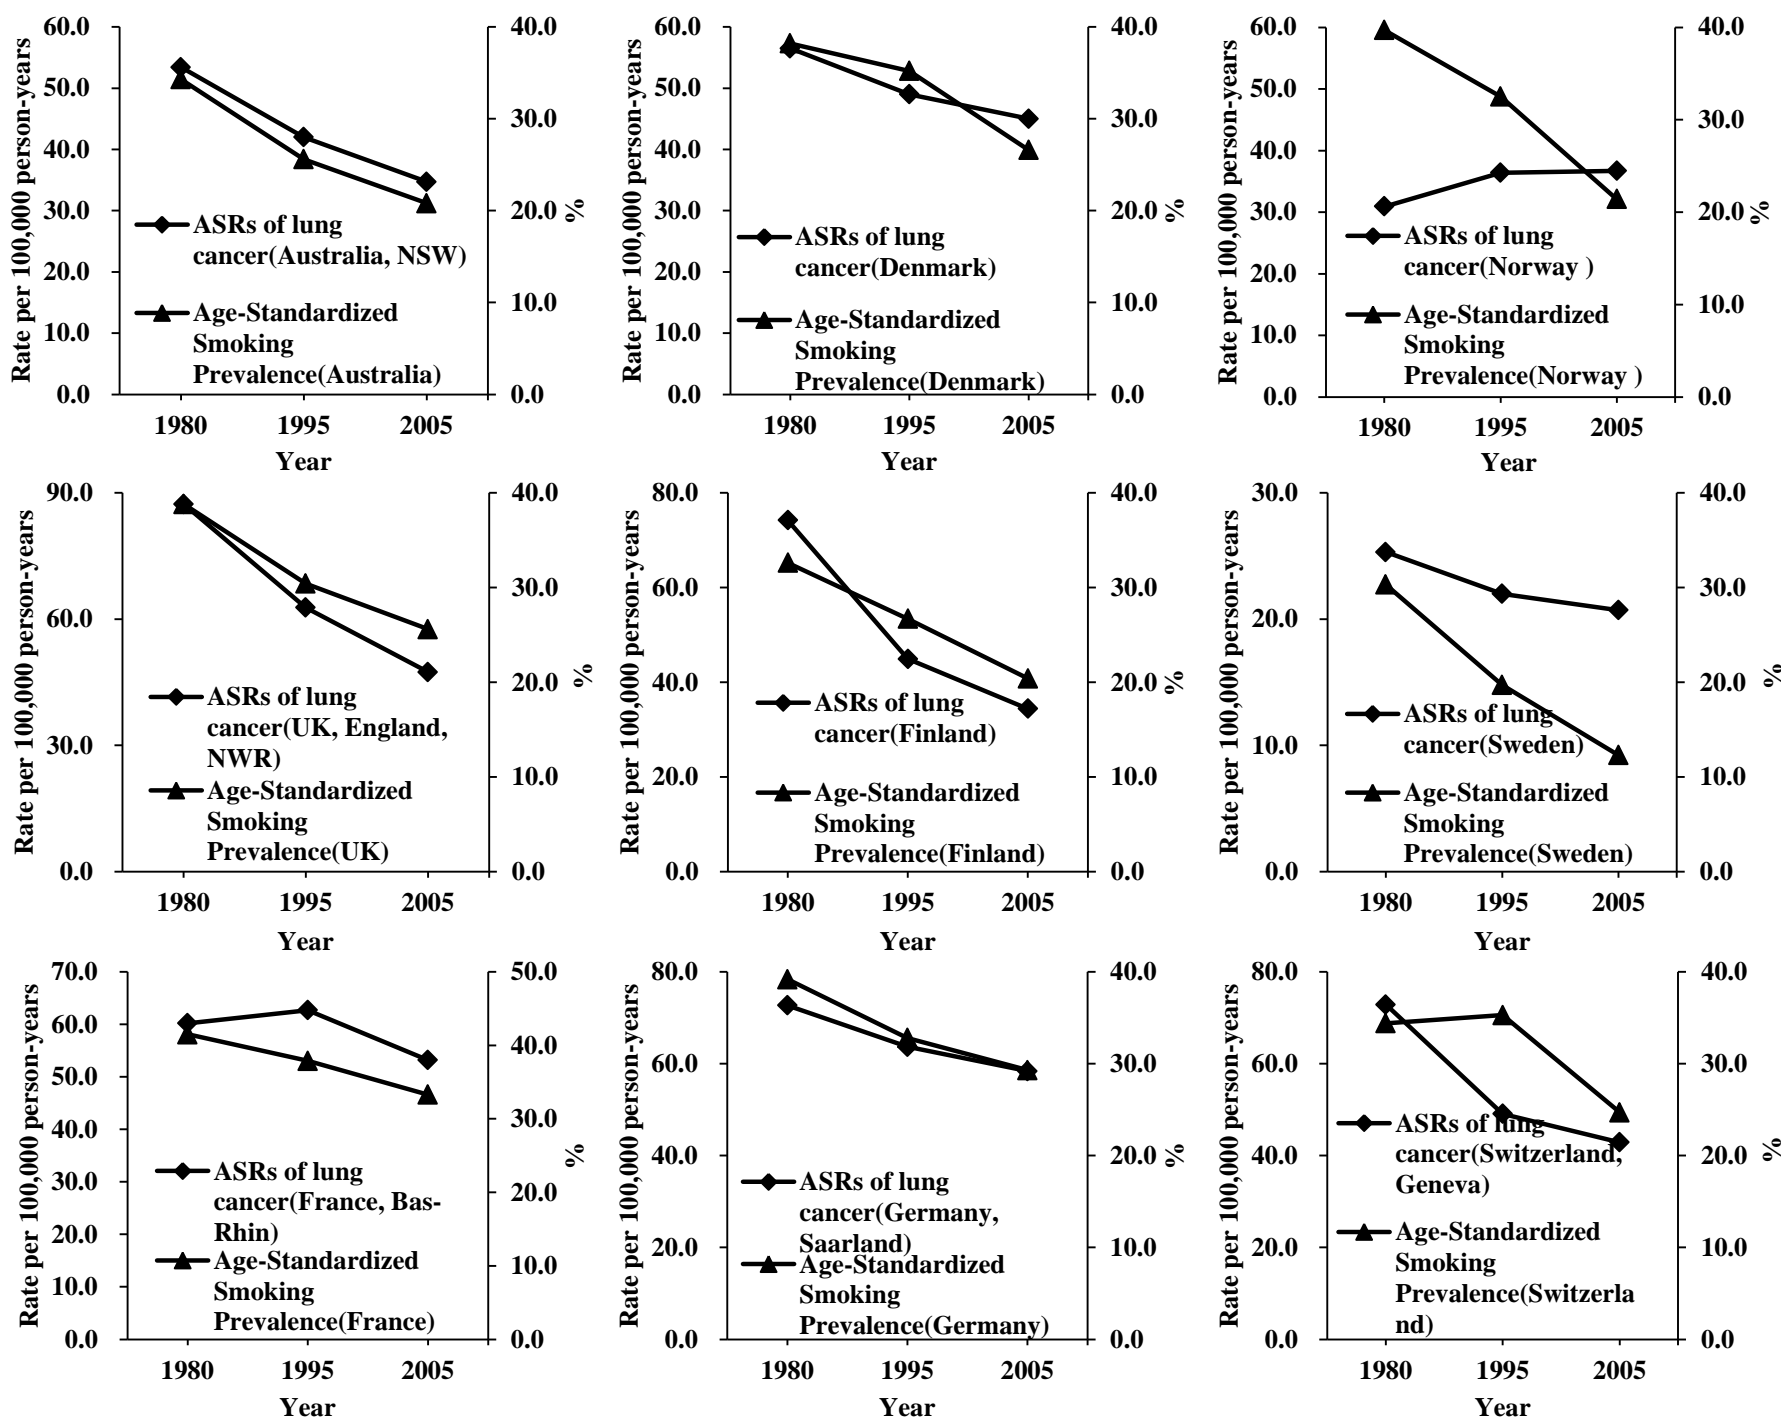

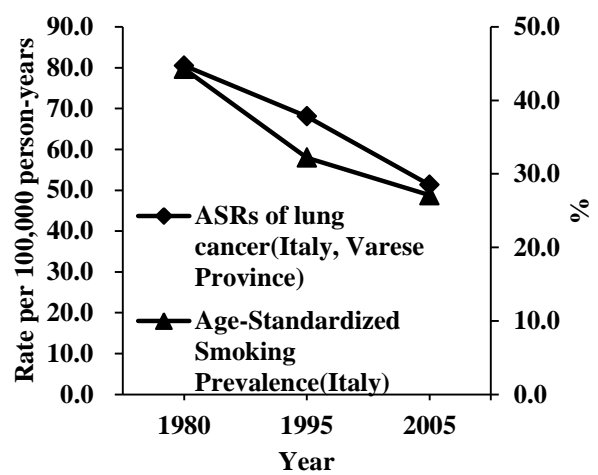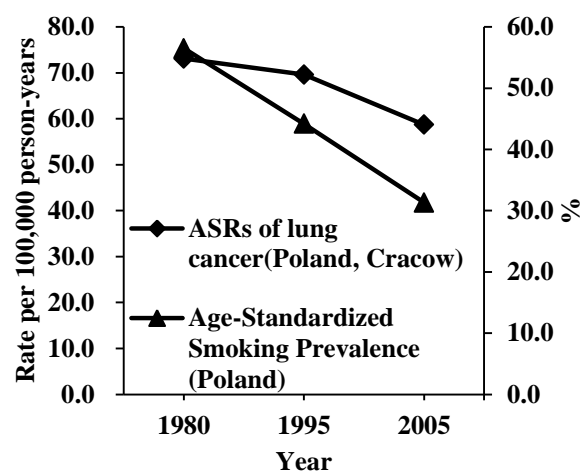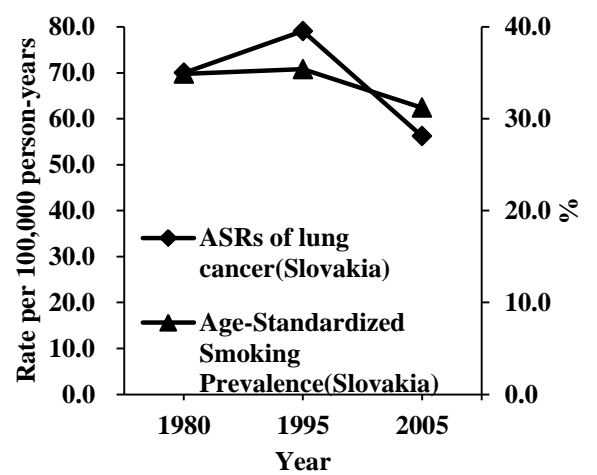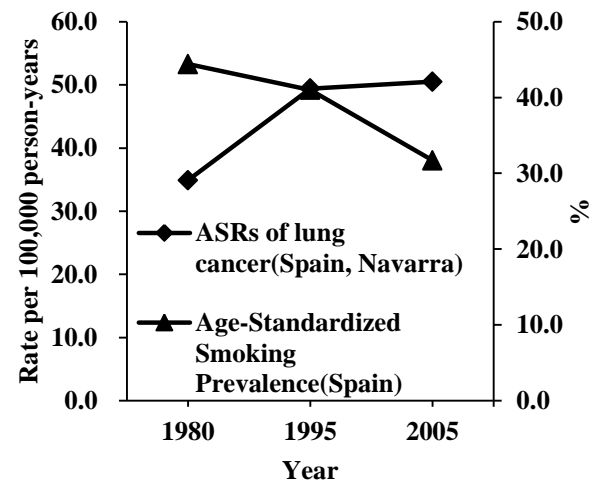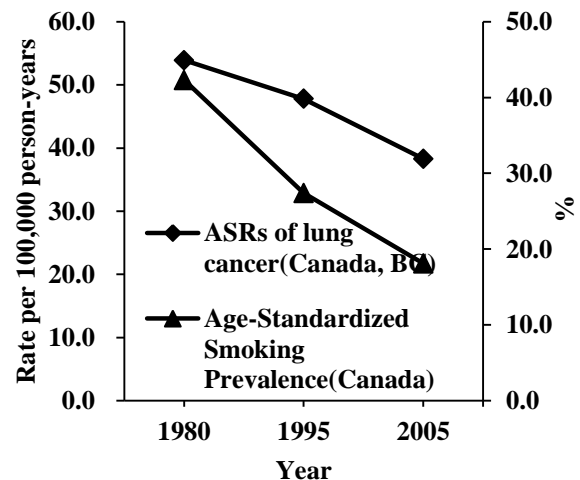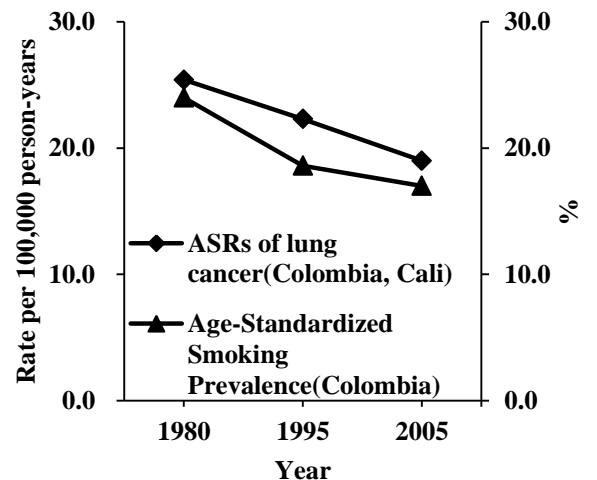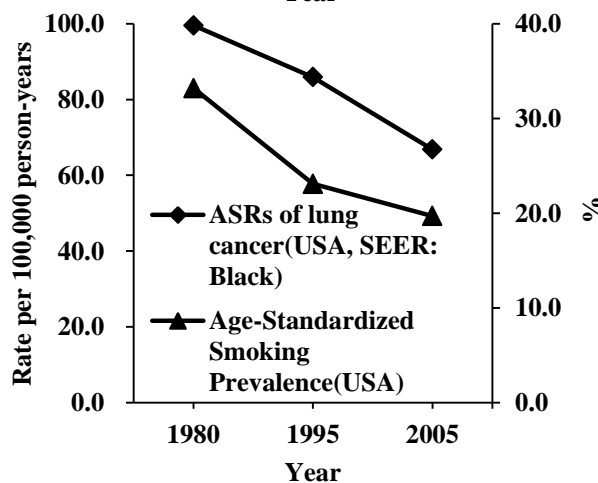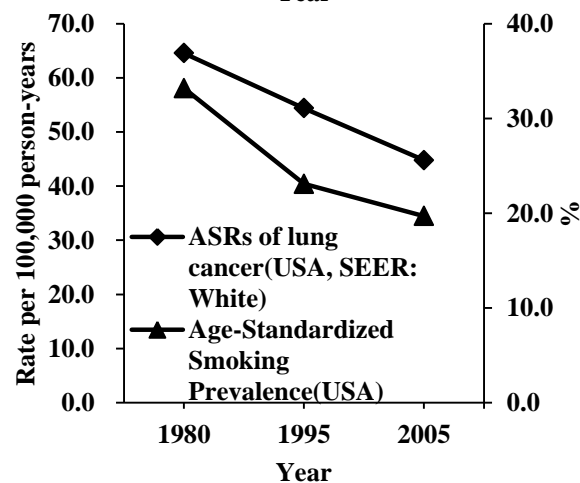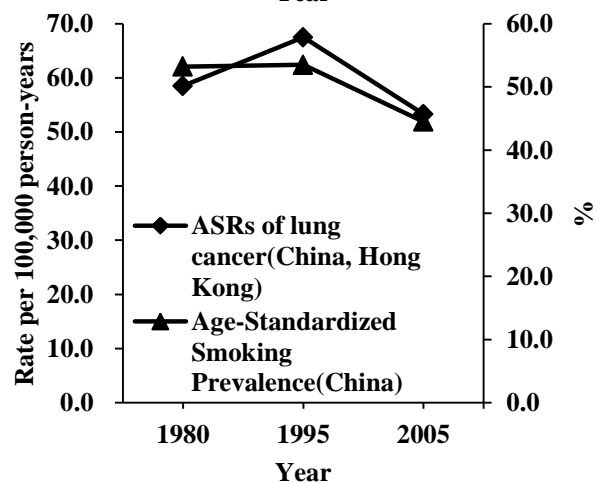

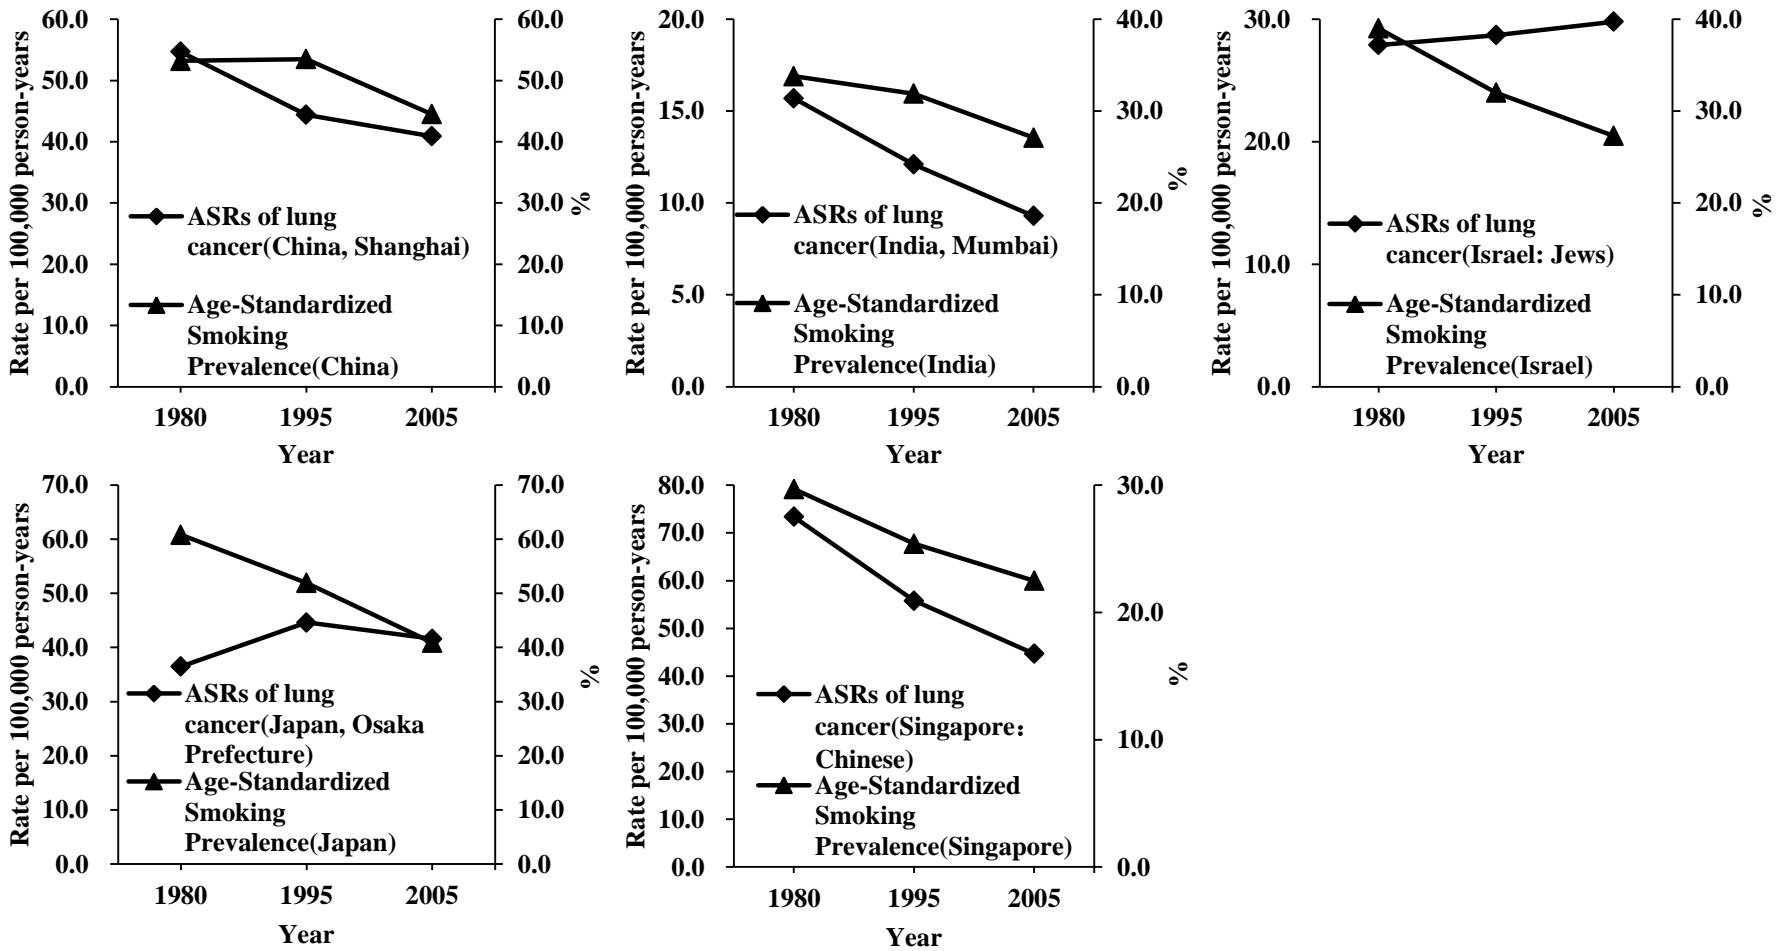

Figure 1 The trends in Age-Standardized smoking prevalence and ASRs of lung cancer for males

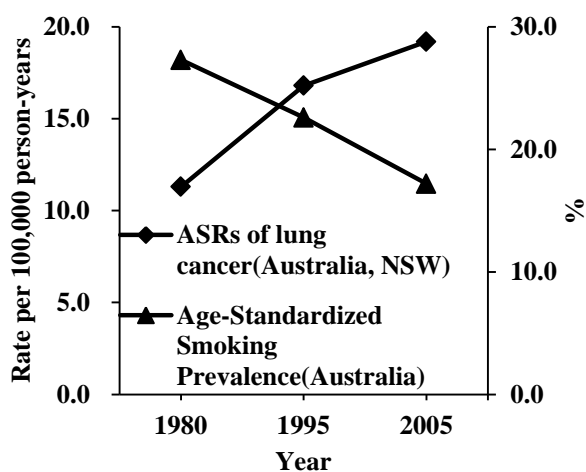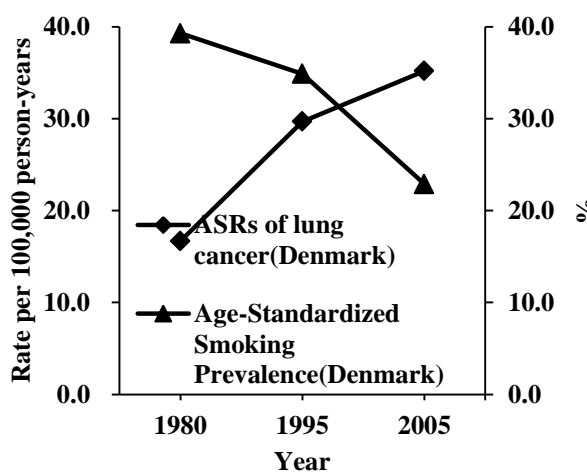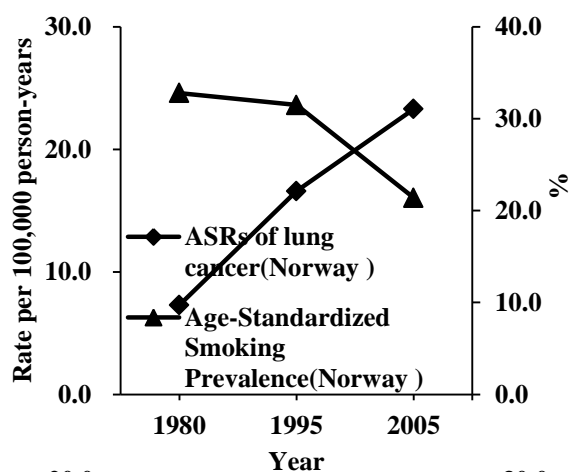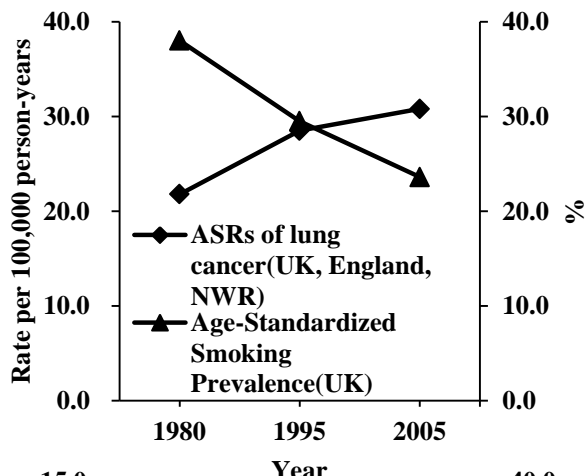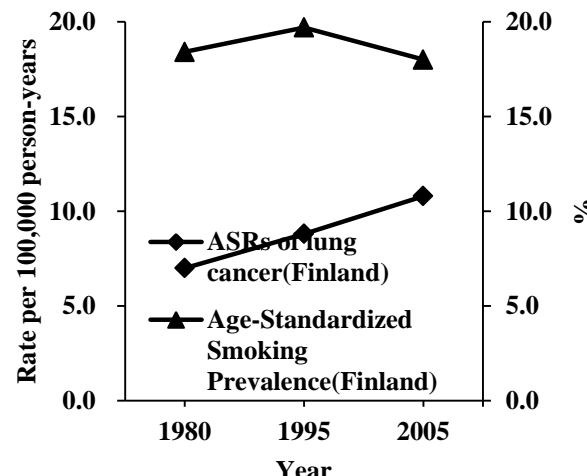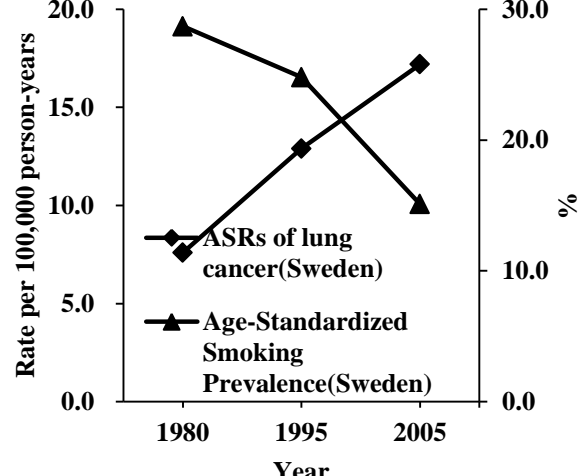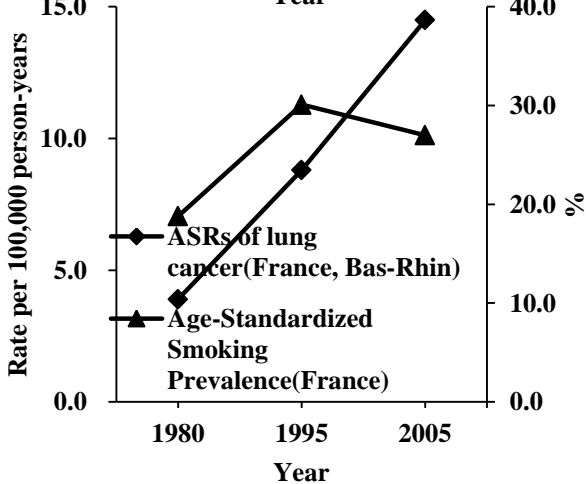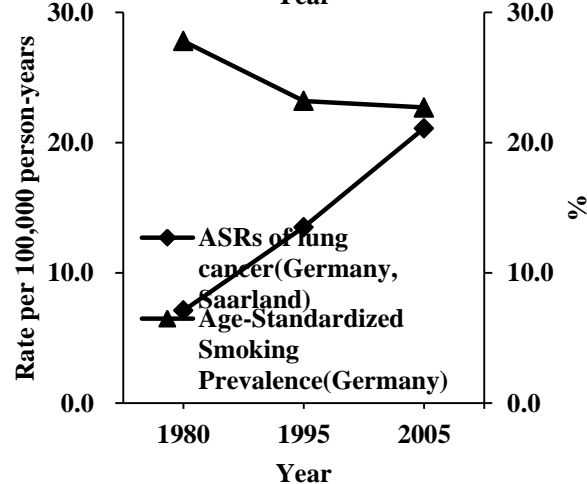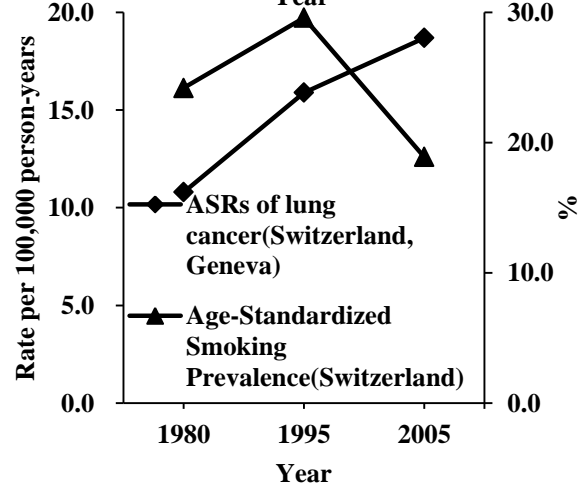

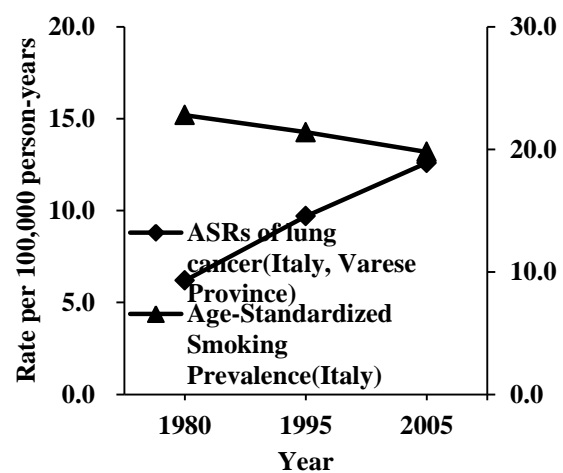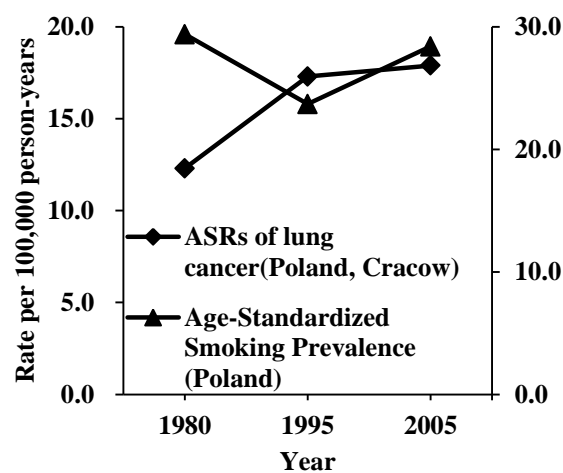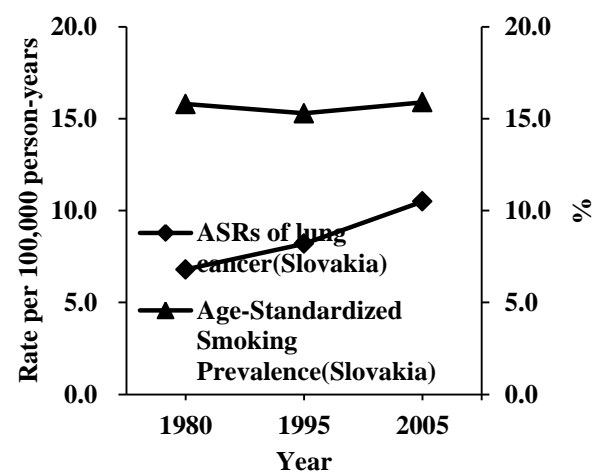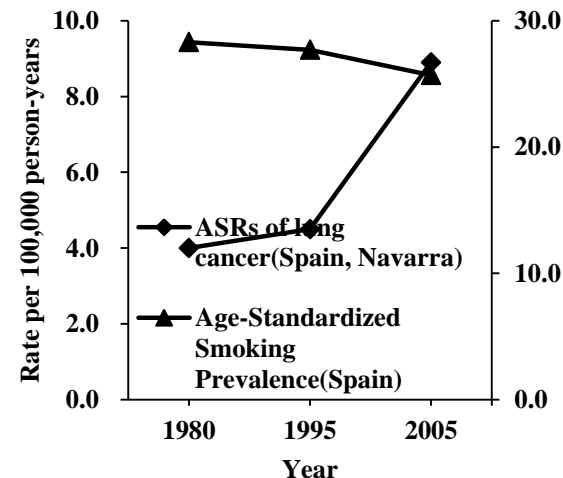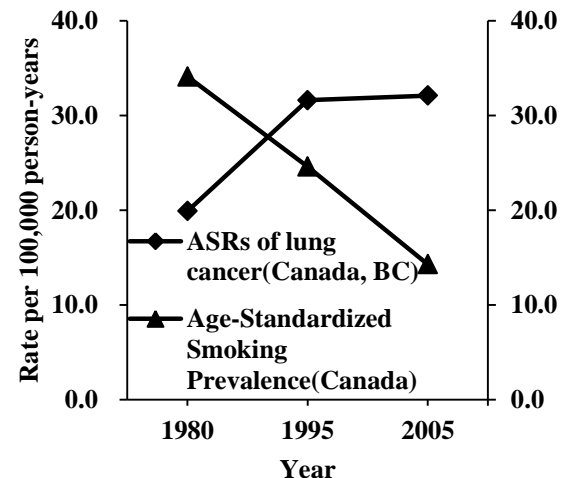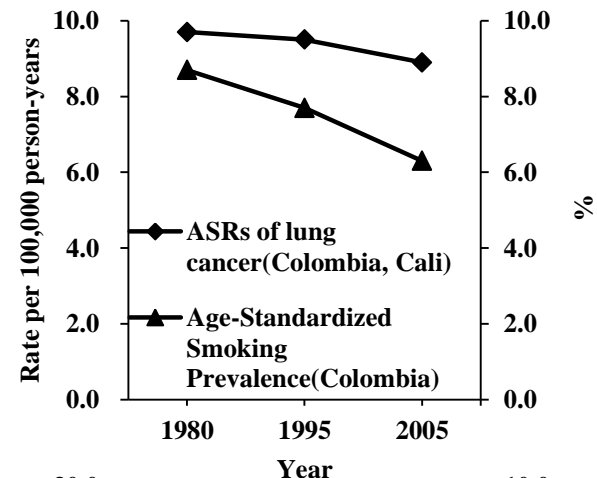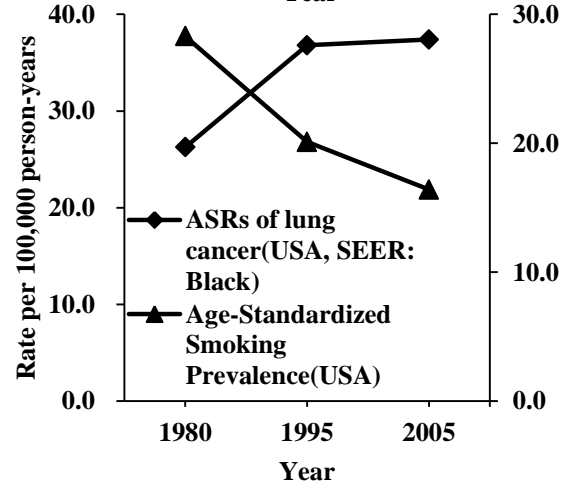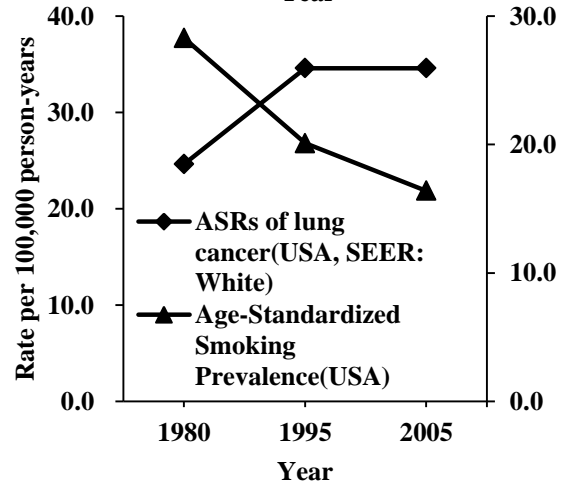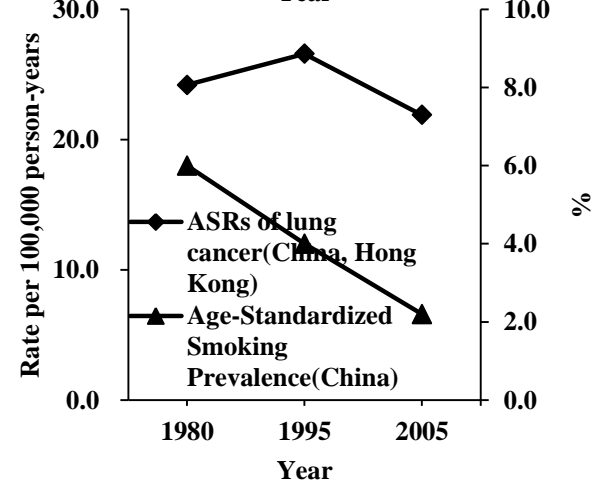

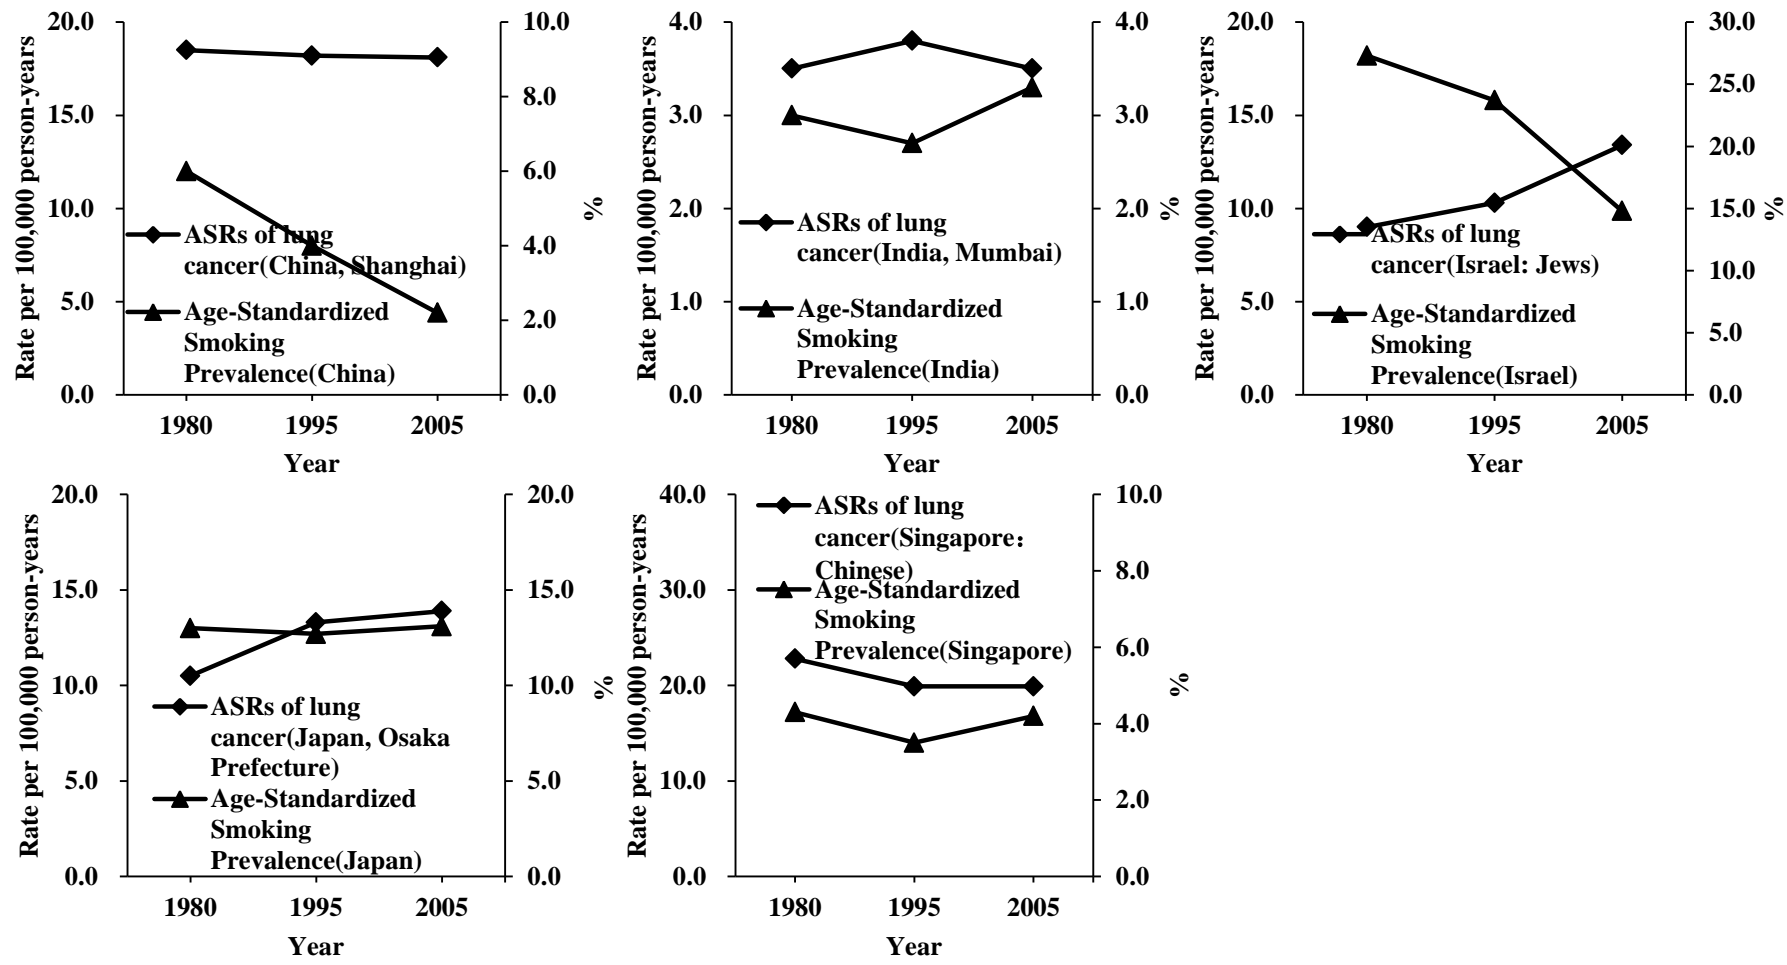

Figure 2 The trends in Age-Standardized smoking prevalence and ASRs of lung cancer for females

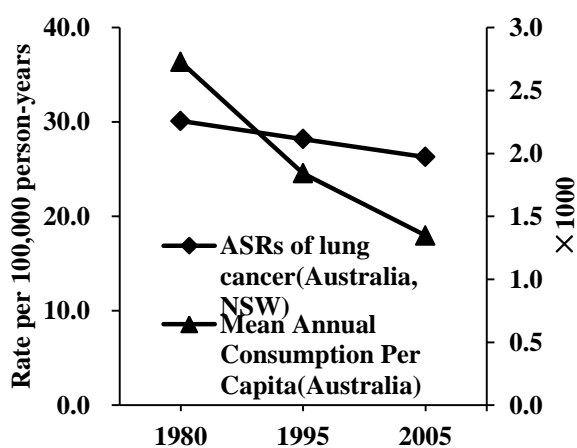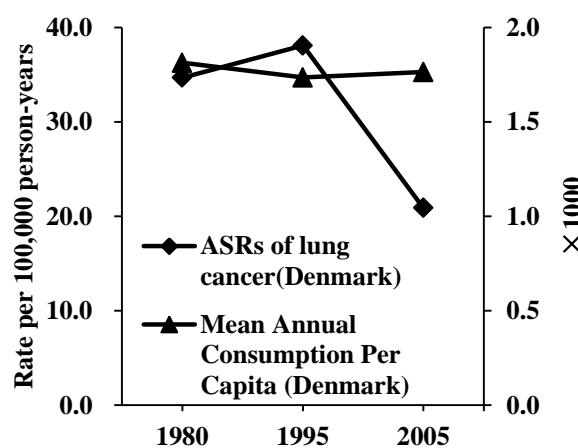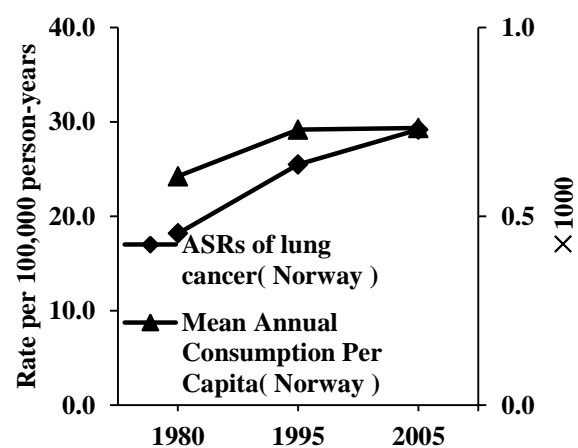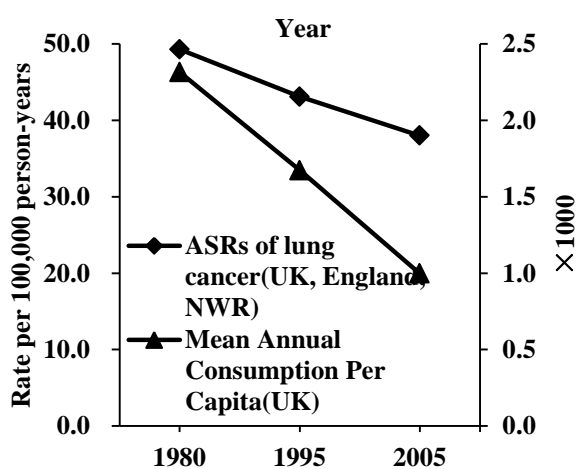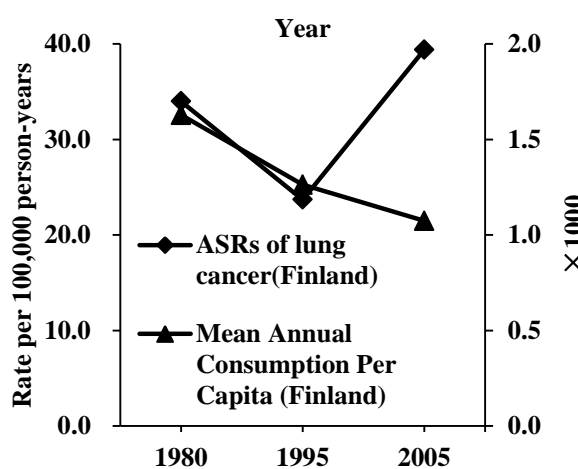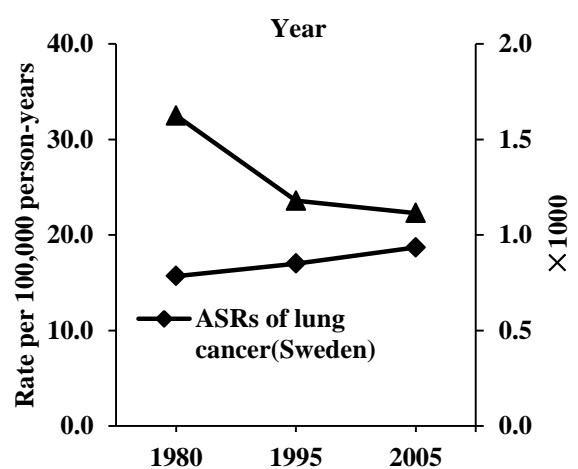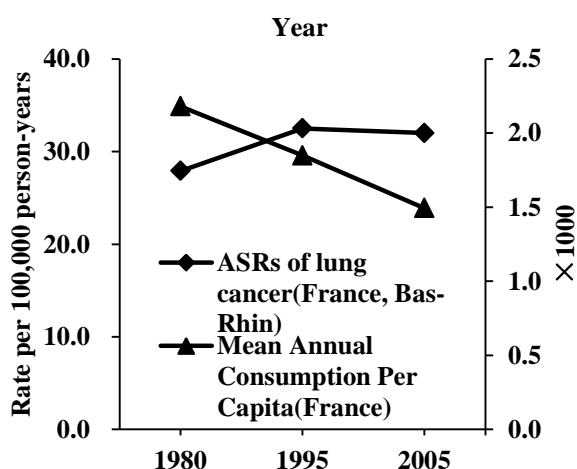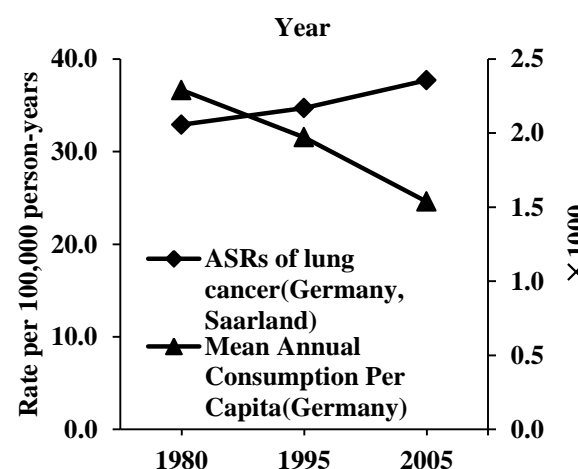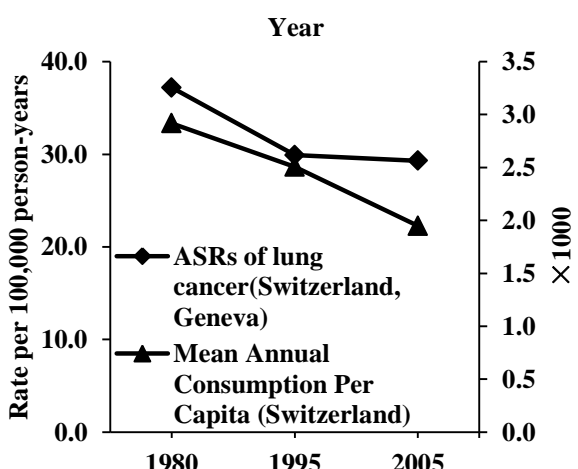

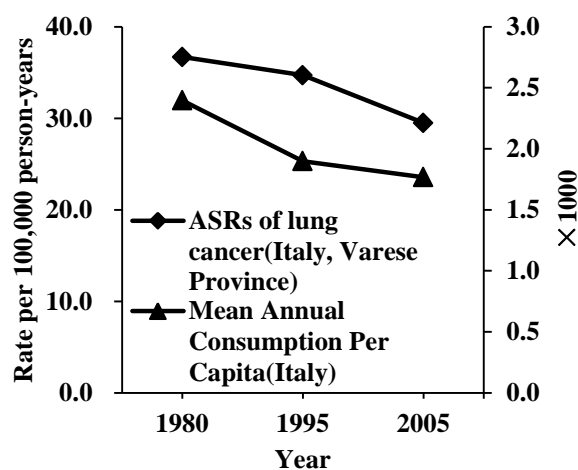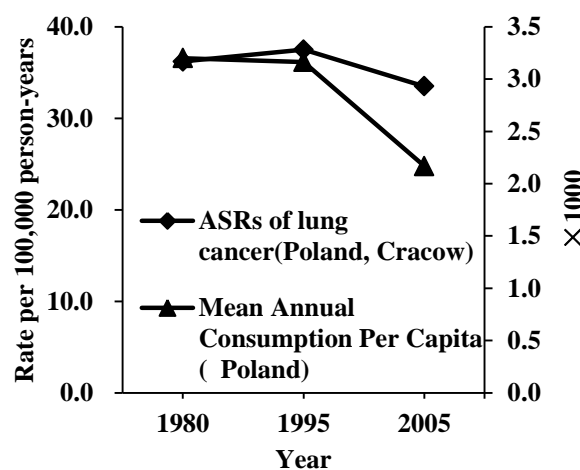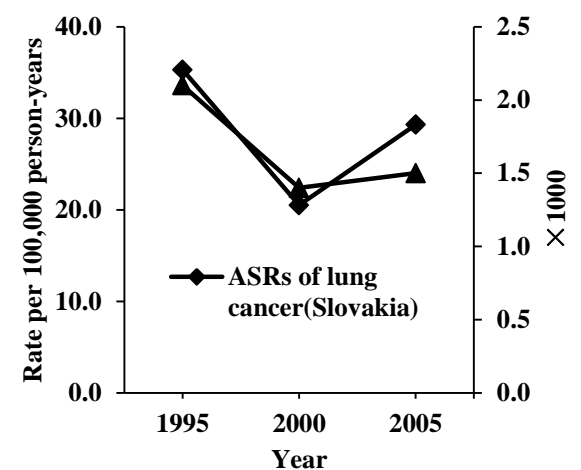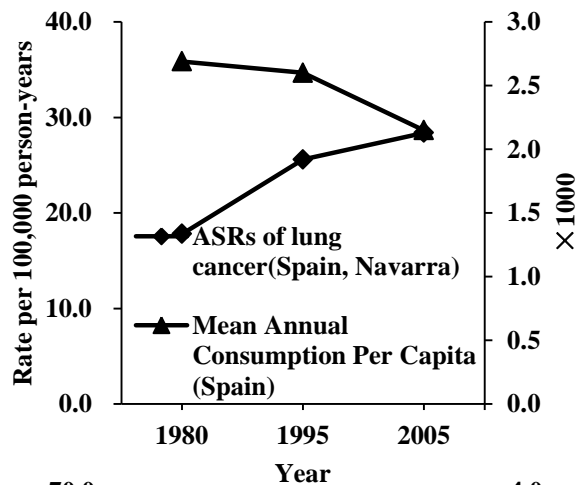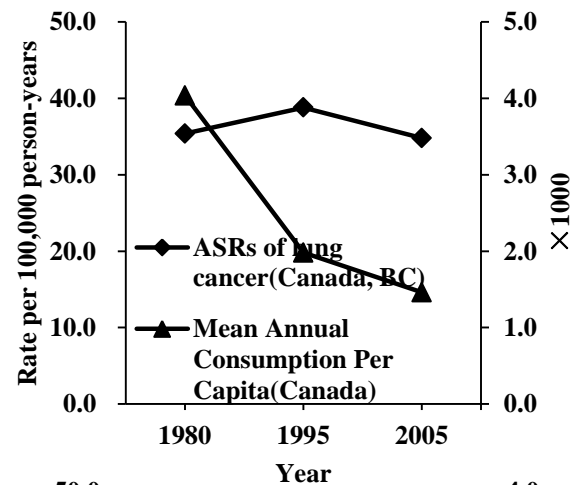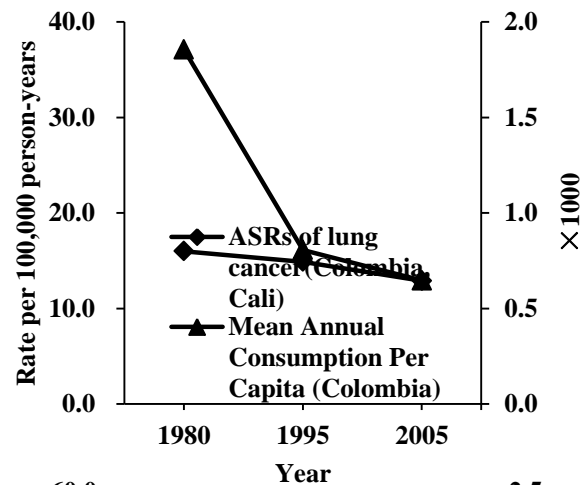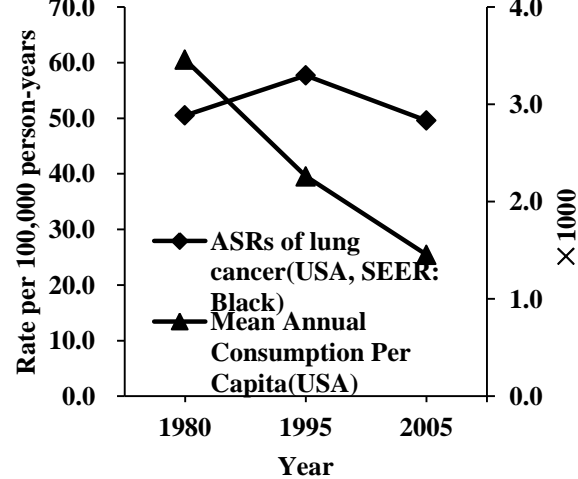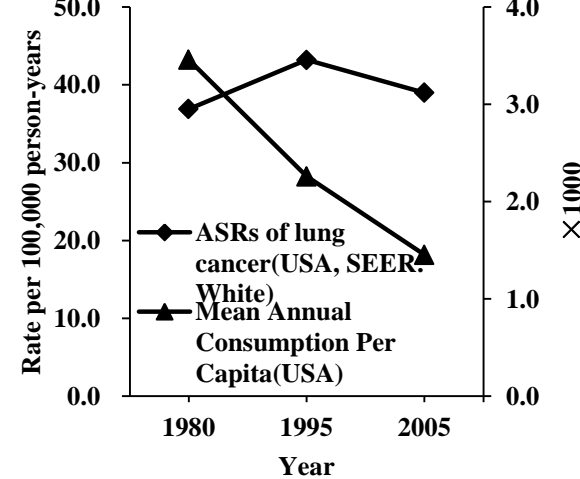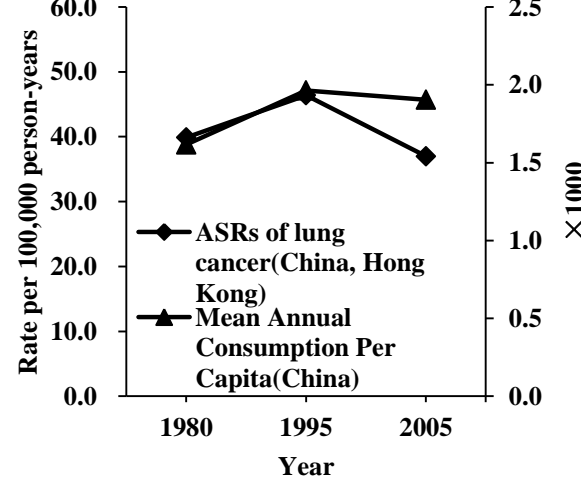



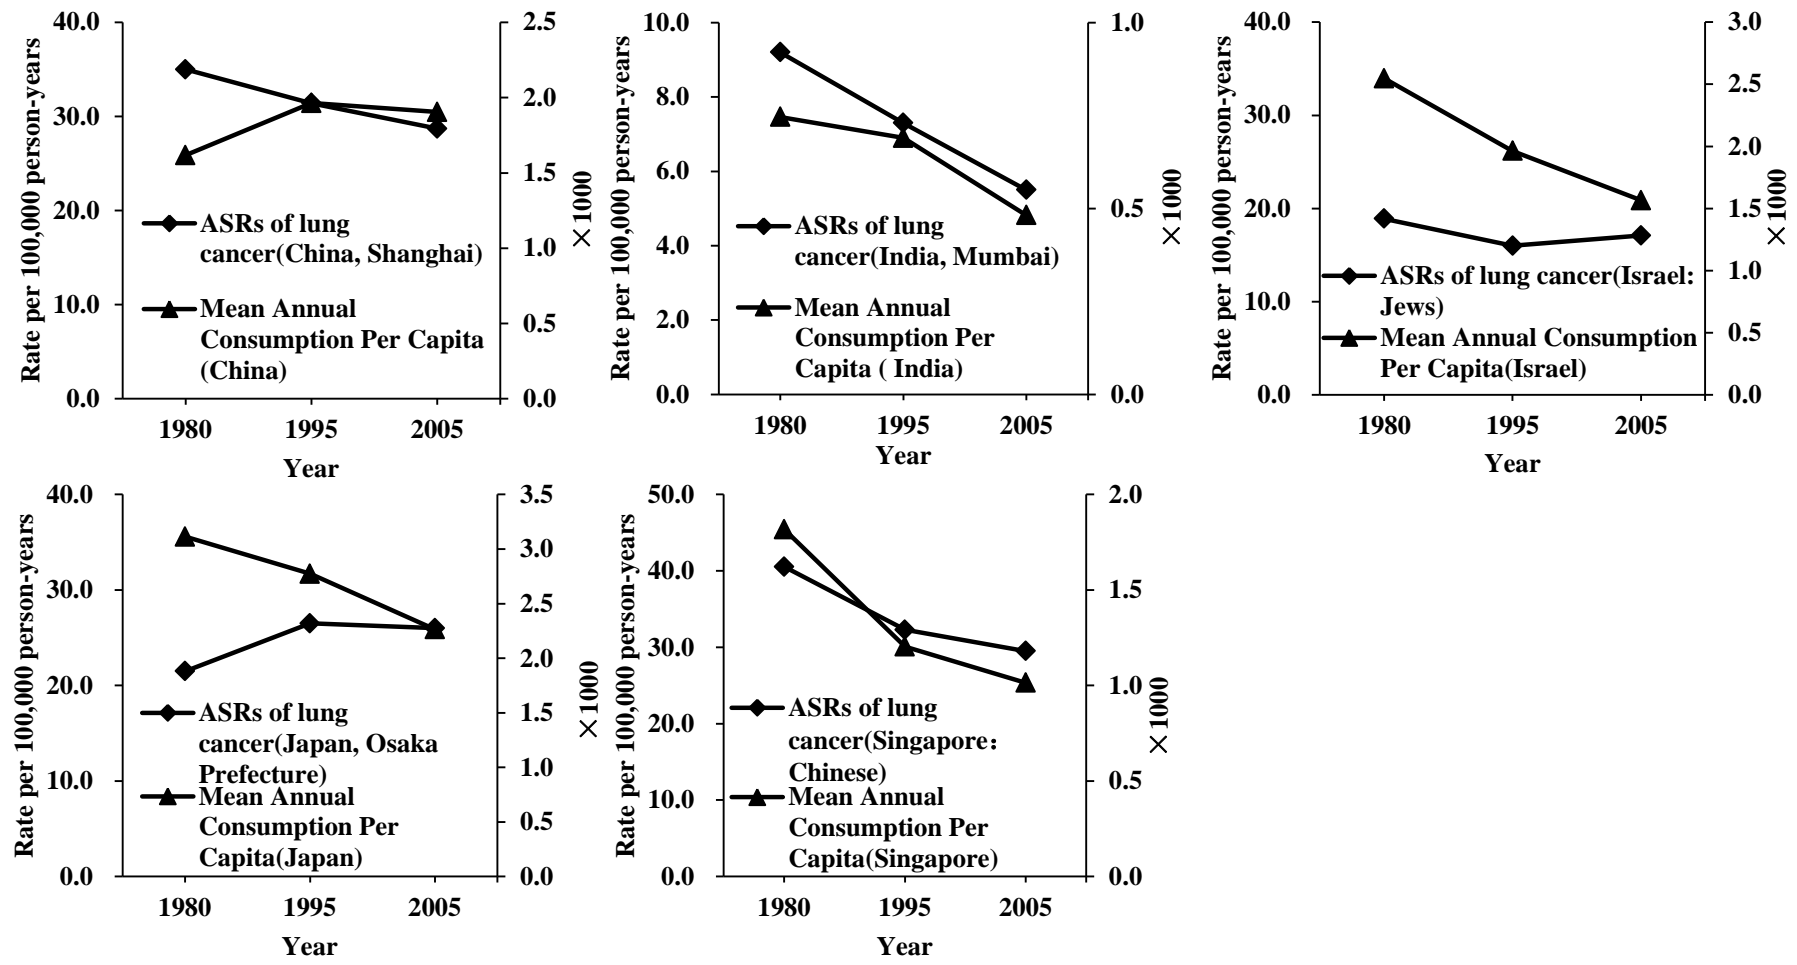

Figure 3 The trends in mean annual consumption per capita and ASRs of lung cancer
